# Supplementary material for: Morphological changes in the self-assembly of a radial oligo-phenylene ethynylene amphiphilic system
Source: Royal Society of Chemistry journal article supplement (doi:10.1039/b818378c), 2008-01-01
Supplement: b818378c.pdf [file b818378c.pdf]

## Supporting Information

### Morphological Changes in the Self-Assembly of a Radial Oligo-Phenylene Ethyne Amphiphilic System

*Gustavo Fernández, Fátima García, and Luis Sánchez\**

Contribution of Departamento de Química Orgánica, Facultad de Ciencias Químicas,  
Universidad Complutense, E-28040 Madrid (Spain). Fax: (+) 34913944103; e-mail:

[lusamar@quim.ucm.es](mailto:lusamar@quim.ucm.es)

#### Contents:

#### 1.- Supplementary Figures

|                                                             |      |
|-------------------------------------------------------------|------|
| <i>Scheme S1</i>                                            | S-2  |
| <i>MALDI-TOF spectra</i>                                    | S-3  |
| <i>Isotopic distribution</i>                                | S-3  |
| <i>Concentration dependent NMR</i>                          | S-4  |
| <i>Variable temperature NMR</i>                             | S-5  |
| <i>UV-Vis dilution experiments</i>                          | S-5  |
| <i>Large size AFM images in acetonitrile/H<sub>2</sub>O</i> | S-6  |
| <i>SEM image in acetonitrile/H<sub>2</sub>O</i>             | S-6  |
| <i>Large size AFM images in acetonitrile</i>                | S-7  |
| <i>Concentration dependent AFM images</i>                   | S-8  |
| <i>AFM images in chloroform</i>                             | S-8  |
| <i>AFM and SEM images in benzene</i>                        | S-9  |
| 2. Experimental Section                                     | S-10 |
| 3. Synthetic details and characterization                   | S-11 |

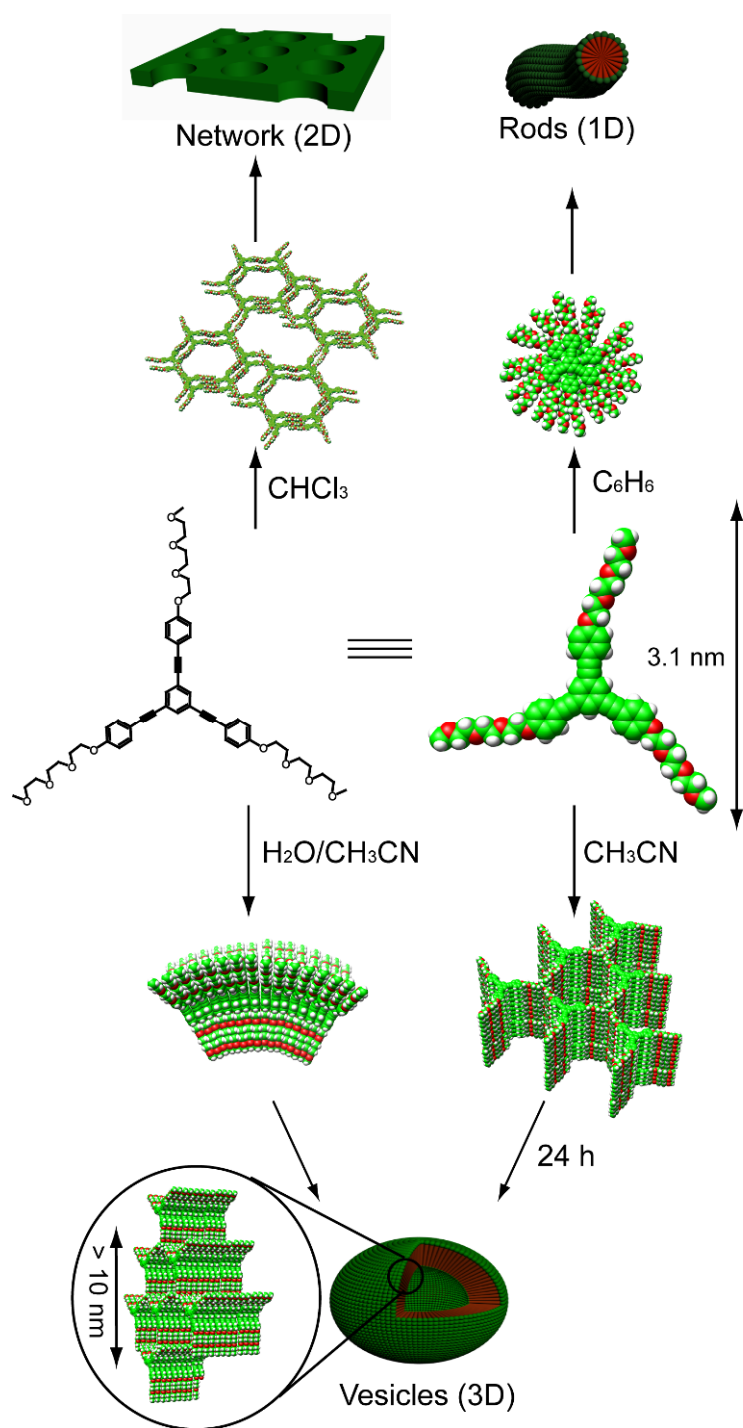

**Scheme S1.** Chemical structure of **1** and cartoon representation of its proposed self-assembly in different solvents.

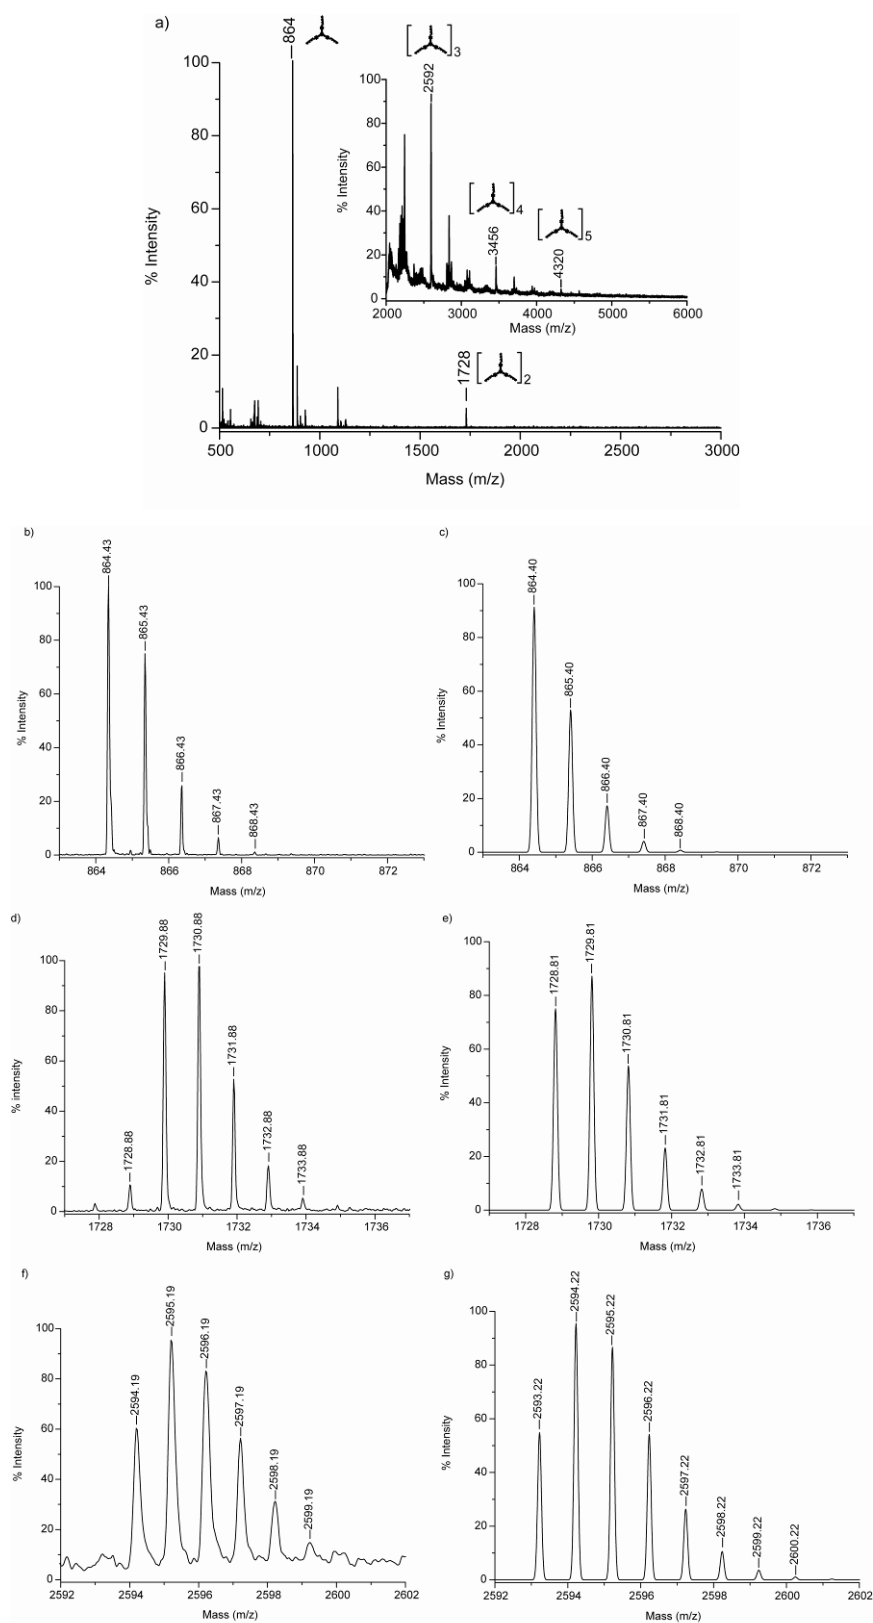

**Figure S1.** a) MALDI-TOF (ditranol) mass spectrum of amphiphile **1**. The inset shows the formation of aggregates in the gas phase. Measured (left) and calculated (right) isotopic distribution of **1** (b, c), its dimer (d, e) and trimer (f, g) in positive, reflector MALDI-TOF spectrum in ditranol as matrix.

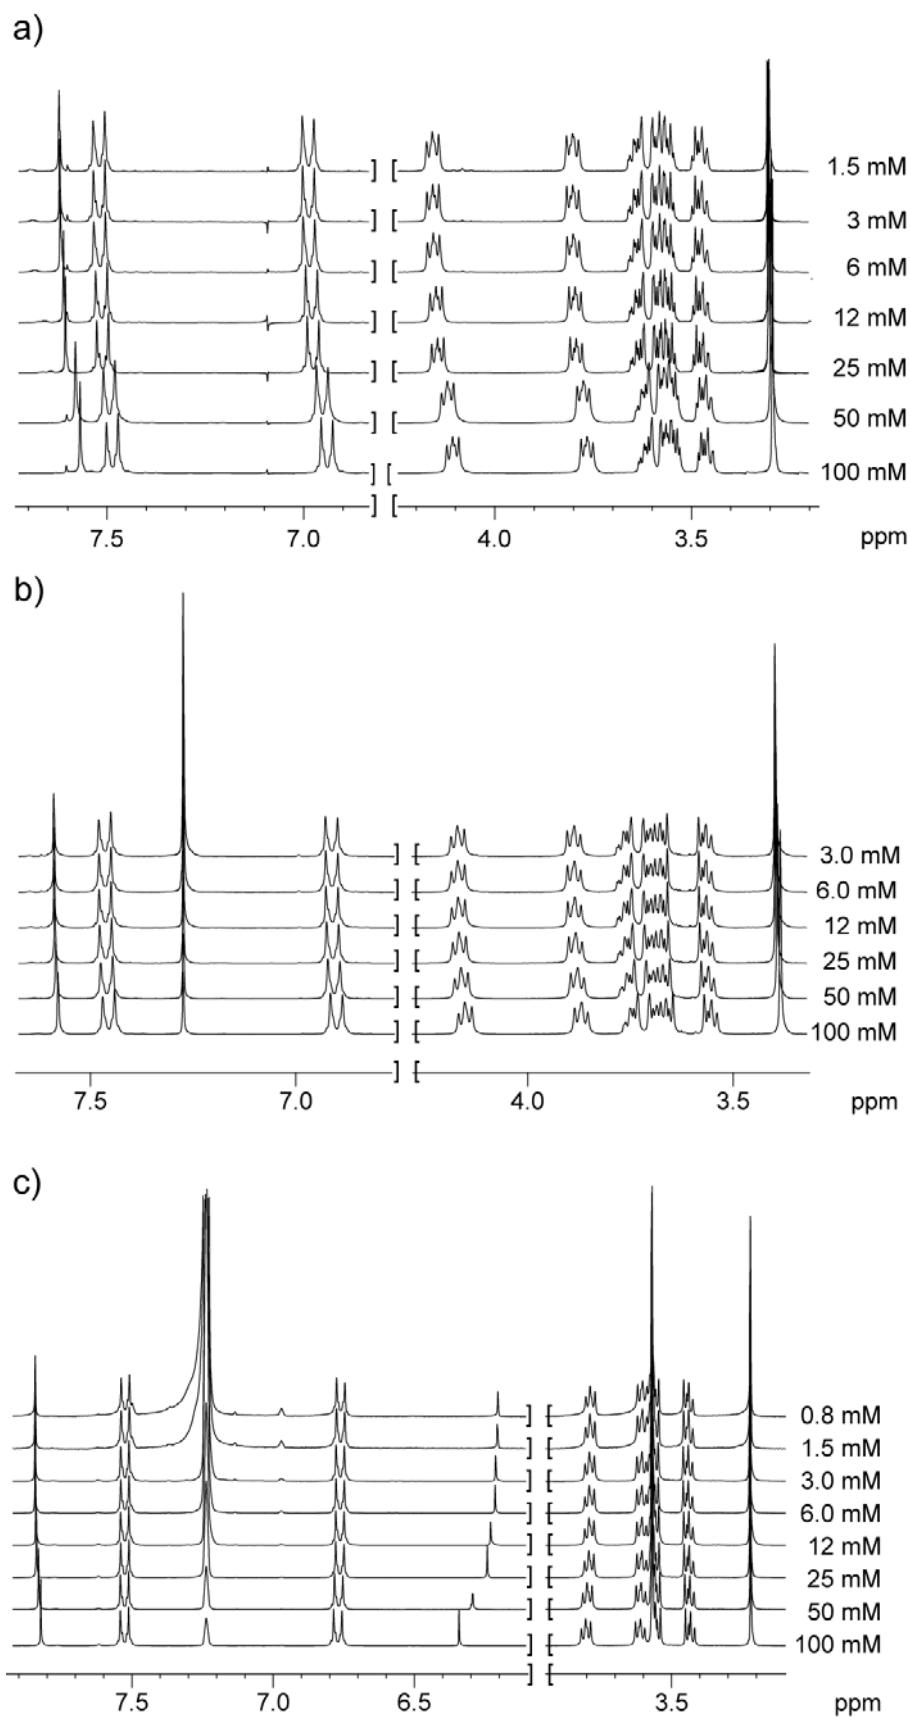

**Figure S2.** Partial  $^1\text{H}$  NMR spectra (300 MHz, 298 K) of **1** at different concentrations (a) in  $\text{CD}_3\text{CN}$ , (b) in  $\text{CDCl}_3$ , and (c) in  $\text{C}_6\text{D}_6$ .

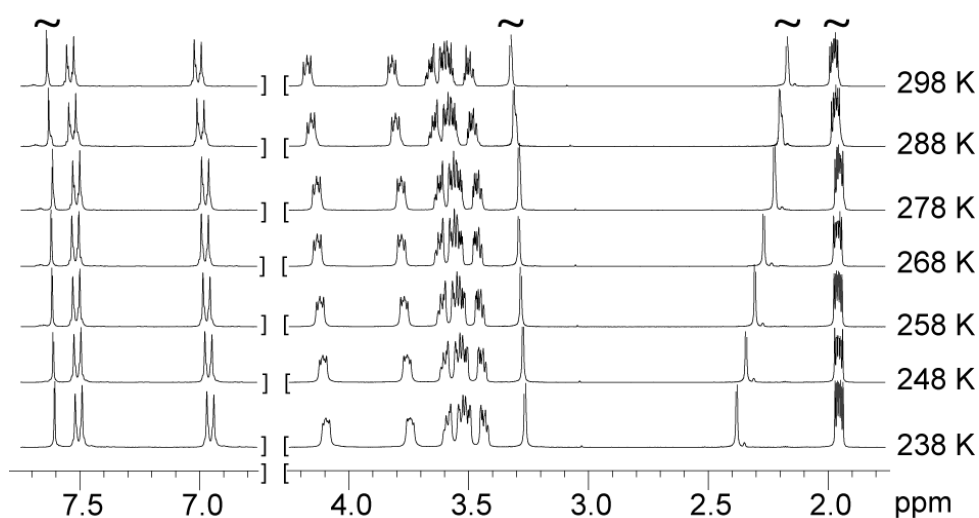

**Figure S3.** Partial variable temperature  $^1\text{H}$  NMR (298-238 K, 4 mM,  $\text{CD}_3\text{CN}$ , 300 MHz) spectra of **1**.

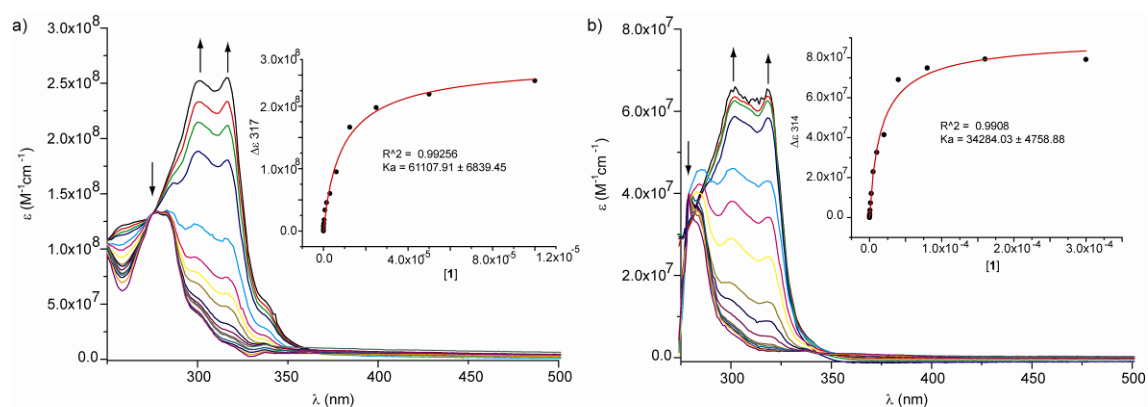

**Figure S4.** Concentration dependent UV-Vis absorption spectra of **1** in  $\text{CHCl}_3$  (a) and  $\text{C}_6\text{H}_6$  (b) (298 K,  $3 \times 10^{-4}$  to  $9 \times 10^{-9}$  M). Arrows indicate the direction of change with increasing concentration. The inset in a) and b) shows the fit of  $\Delta\epsilon$  at 317 and 314 nm, respectively, to the isodesmic model (see: Würthner, F.; Thalacker, C.; Diele, S.; Tschierske, C. *Chem. Eur. J.* **2001**, *7*, 2245-2253).

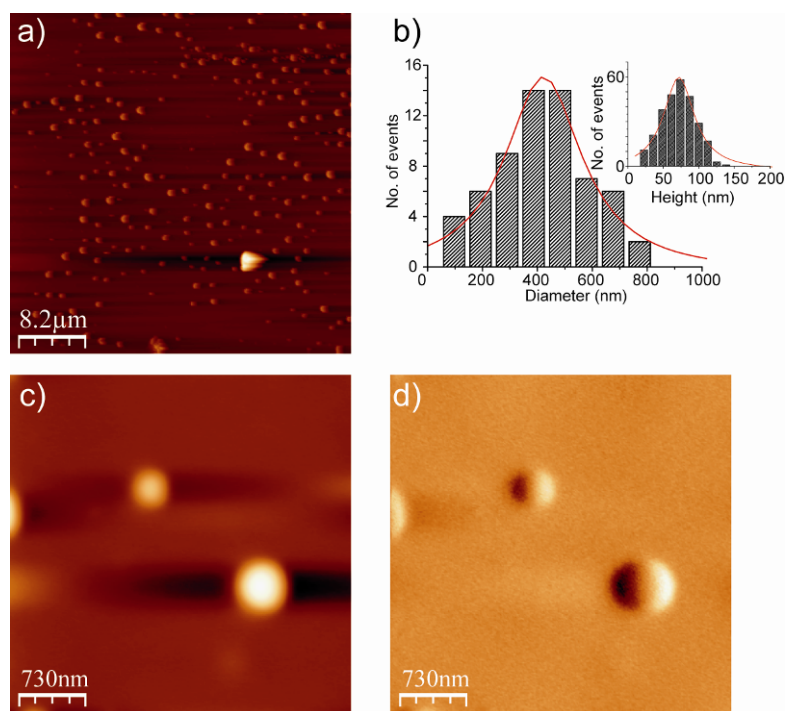

**Figure S5.** Tapping-mode AFM images (air, 298 K) of a drop-cast of a 1:1 H<sub>2</sub>O/MeCN mixture ( $\sim 10^{-6}$  M) of **1** on mica. (a) Large size (50 x 50 μm) image (Z scale = 200 nm); (b) diameter and height histograms (Lorentzian fit,  $R^2 = 0.97$ ) after the tip broadening correction; (c, d) height and phase images of an expanded area (Z scale = 80 nm).

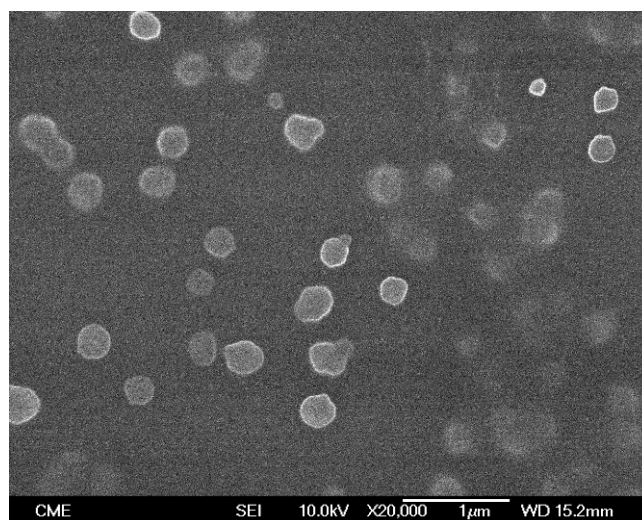

**Figure S6.** SEM image (298 K) of a drop-cast of a mixture acetonitrile/H<sub>2</sub>O (1/1) of **1** ( $\sim 1 \times 10^{-4}$  M) on glass plate.

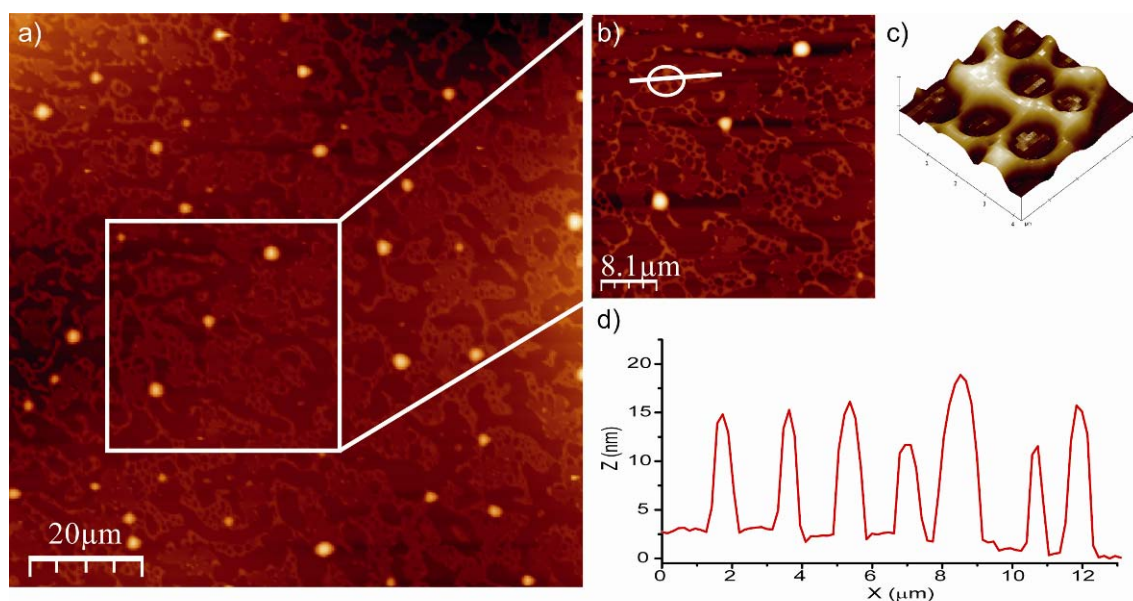

**Figure S7.** Tapping-mode AFM images (air, 298 K) of a drop-cast of a freshly prepared MeCN solution ( $\sim 10^{-6}$  M) of **1** on mica. Large size (100 x 100  $\mu\text{m}$ , Z scale = 120 nm) (a) and (50 x 50  $\mu\text{m}$ , Z scale = 90 nm) (b) images; (c) 3D image of the encircled (white circle in b) area; (d) height profile of selected region (white line).

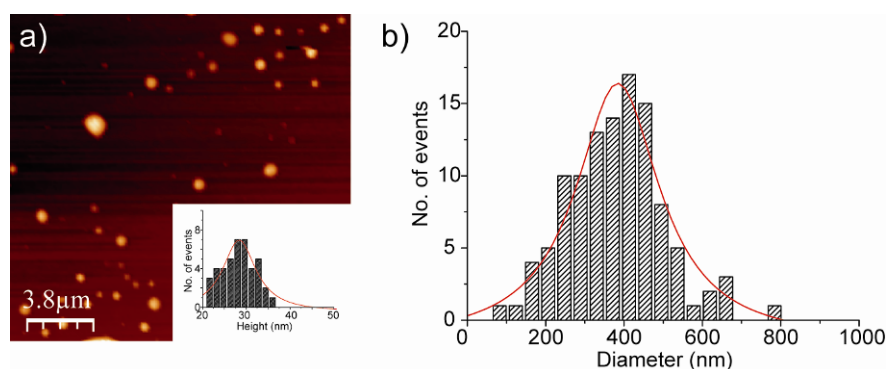

**Figure S8.** (a) Tapping-mode AFM image (air, 298 K, Z scale = 100 nm) of **1** ( $\sim 10^{-6}$  M in MeCN) upon aging the sample onto mica. The inset show the height histogram and the corresponding Lorentzian fit. (a) Diameter histogram after the tip broadening correction and the corresponding Lorentzian fit ( $R^2 = 0.94$ ).



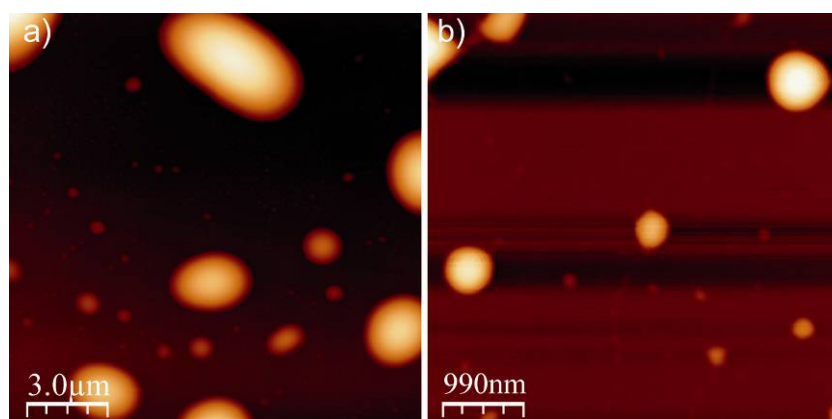

**Figure S9.** Tapping-mode AFM images (air, 298 K) of a drop-cast of a 1:1 H<sub>2</sub>O/MeCN mixture at  $\sim 10^{-4}$  M (Z scale = 120 nm)(a) and  $\sim 10^{-7}$  M (100 nm) (b) of **1** on mica.

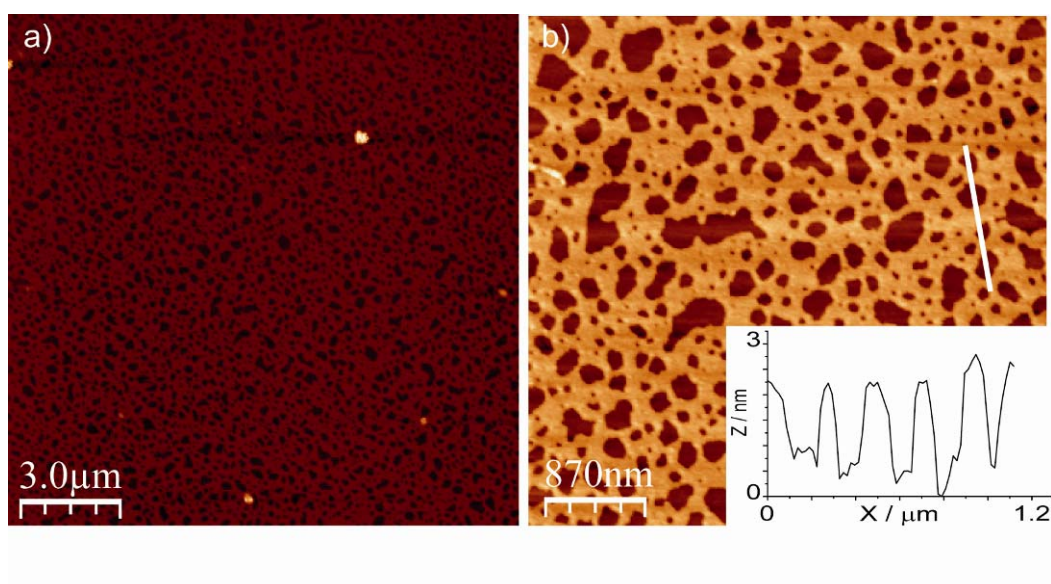

**Figure S10.** Tapping-mode AFM images (air, 298 K, Z scale = 50 nm for a, and Z scale = 7 nm for b) of a drop-cast of a chloroform solution of **1** on mica. The inset in (b) shows the height profile of the selected area (white line)



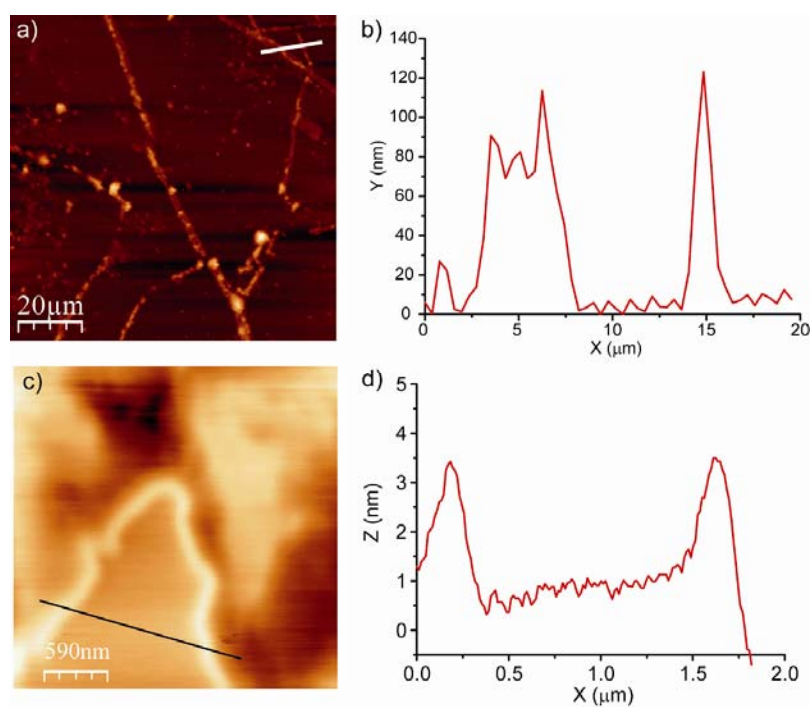

**Figure S11.** a) and c) Tapping-mode AFM images (air, 298 K,  $10^{-6}$  M, Z scale = 350 for a; Z scale = 10 nm for c) of a drop-cast of a benzene solution of **1** on mica; b) and d) Profiles of the selected rods formed.

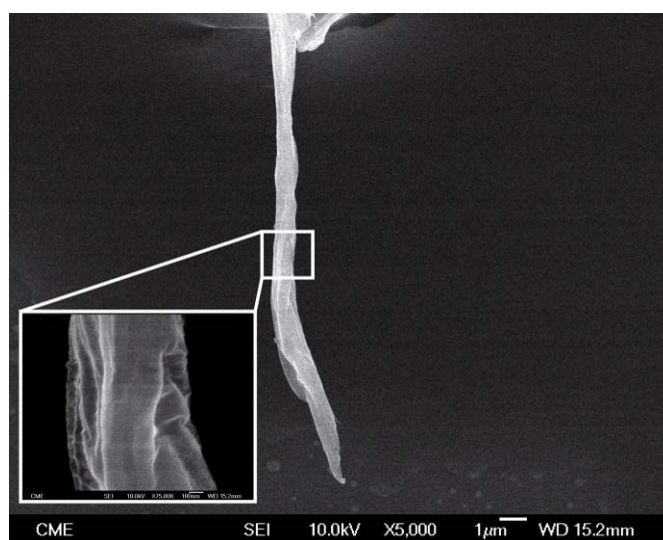

**Figure S12.** SEM image (298 K) of a drop-cast of a benzene solution of **1** ( $\sim 1 \times 10^{-4}$  M) on glass plate.

## 2. Experimental Section

**General.** All solvents were dried according to standard procedures. Reagents were used as purchased. All air-sensitive reactions were carried out under argon atmosphere. Flash chromatography was performed using silica gel (Merck, Kieselgel 60, 230-240 mesh or Scharlau 60, 230-240 mesh). Analytical thin layer chromatography (TLC) was performed using aluminum coated Merck Kieselgel 60 F254 plates. NMR spectra were recorded on a Bruker Avance 300 ( $^1\text{H}$ : 300 MHz;  $^{13}\text{C}$ : 75 MHz) spectrometer at 298 K using partially deuterated solvents as internal standards. Coupling constants (J) are denoted in Hz and chemical shifts ( $\delta$ ) in ppm. Multiplicities are denoted as follows: s = singlet, d = doublet, t = triplet, m = multiplet, br = broad. FT-IR spectra were recorded on a Bruker Tensor 27 (ATR device) spectrometer. UV-Vis spectra were recorded on a Varian Cary 50 spectrophotometer. Matrix Assisted Laser Desorption Ionization (coupled to a Time-Of-Flight analyzer) experiments (MALDI-TOF) were recorded on a Bruker REFLEX spectrometer. Dynamic Light Scattering measurements were carried out on an ALV GSC08 correlator working in a cross-correlation mode with an  $\text{Ar}^+$  laser operating at  $\lambda = 514.5$  nm. The output signals were obtained with backscatter detection at an angle of  $30^\circ$  and processed with a digital correlator that computed intensity-intensity autocorrelation of the scattered light. Measurements were made in a 1-cm path-length round quartz cell maintained at 298 K. Solution samples were filtered through nylon Acrodisc syringe filters (Pall Life Sciences) with 0.2- $\mu\text{m}$  pore size. Atomic Force Microscopy was performed on a SPM Nanoscope IIIa multimode microscope working on tapping mode with a RTESPA tip (Veeco) at a working frequency of  $\sim 235$  kHz. SEM images were obtained from on a JEOL JSM 6335F microscope working at 10kV. Fluorescence images were recorded on a Leica TCE SP2 confocal microscope. TEM measurements were performed on a JEOL 2000-FX electron microscope, operating at an acceleration voltage of 200 kV.

### 3. Synthetic details and characterization

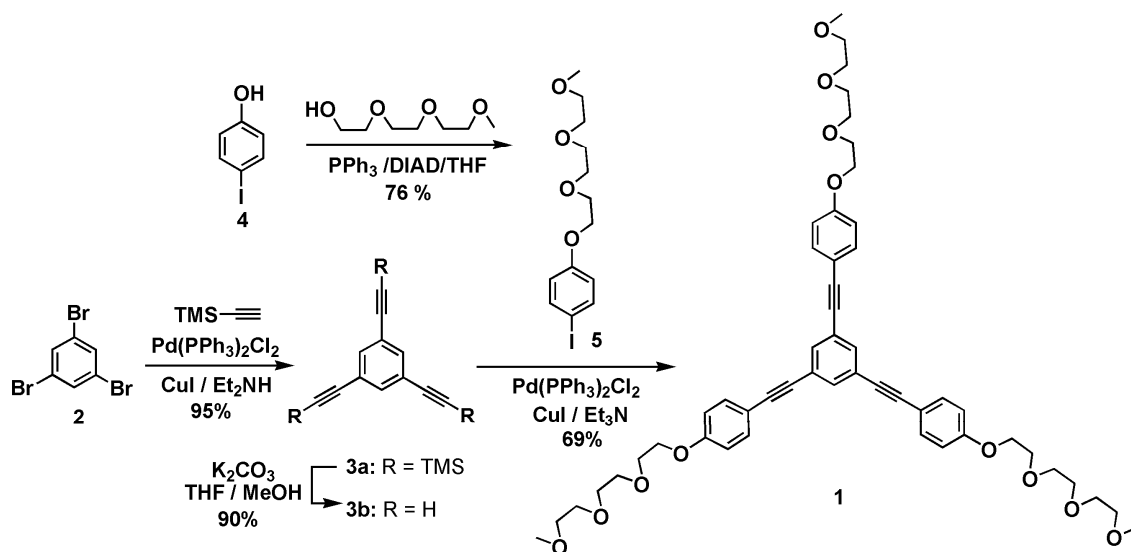

Compounds **3a**, and **3b** were prepared according to previously reported synthetic procedures (see W. Uhl, H. R. Bock, F. Breher, M. Claesener, S. Haddadpour, B. Jasper, A. Hepp, *Organometallics* **2007**, *26*, 2363-2369) and showed identical spectroscopic properties to those reported therein.

#### Compound 5

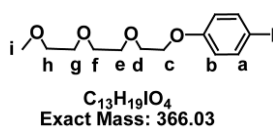

Diisopropyl azodicarboxylate (DIAD) (7.66 g, 37.91 mmol) was added portionwise to a previously cooled solution (0 °C) of iodophenol (5.56 g, 25.27 mmol) and triethylene glycol monomethyl ether (4.98 g, 30.31 mmol) in dry THF (50 mL) under argon atmosphere. The mixture was allowed to warm up to room temperature and stirred overnight. After evaporation of the solvent under reduced pressure the triphenylphosphine oxide generated in the reaction was precipitated with a diethyl ether/hexane mixture (1:1) and the liquid residue was purified by column chromatography (silica gel, hexane:diethyl ether 1:2) affording **5** as a yellow oil (7.00 g, 76%). <sup>1</sup>H NMR (CDCl<sub>3</sub>, 300 MHz) δ 7.51 (2H, H<sub>a</sub>, d, J = 9Hz), 6.67 (2H, H<sub>b</sub>, d, J = 9Hz), 4.06 (2H, H<sub>c</sub>, t, J = 4.7 Hz), 3.81 (2H, H<sub>d</sub>, t, J = 4.7 Hz), 3.71-3.68 (2H, H<sub>e</sub>, m), 3.66-3.50 (6H, H<sub>f+g+h</sub>, m), 3.34 (3H, H<sub>i</sub>, s); <sup>13</sup>C NMR (CDCl<sub>3</sub>, 75Mz) δ 159.1, 138.5, 117.4, 83.3,

72.3, 71.2, 71.0, 70.9, 70.0, 67.9, 59.4; FTIR (neat) 635, 696, 821, 945, 999, 1107, 1176, 1244, 1282, 1351, 1453, 1485, 1572, 1586, 1730, 2875  $\text{cm}^{-1}$ ; ESI-MS  $m/z$   $[M^+]=366$ .

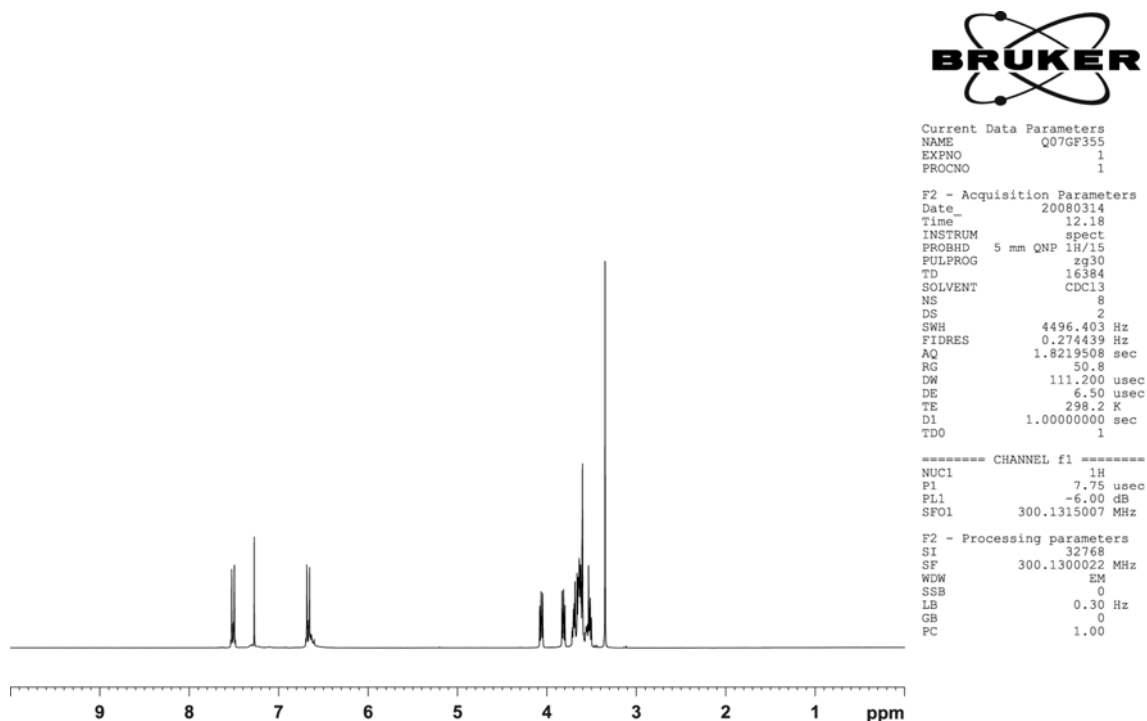

$^1\text{H}$  NMR ( $\text{CDCl}_3$ , 300 MHz, 298 K) of compound 5

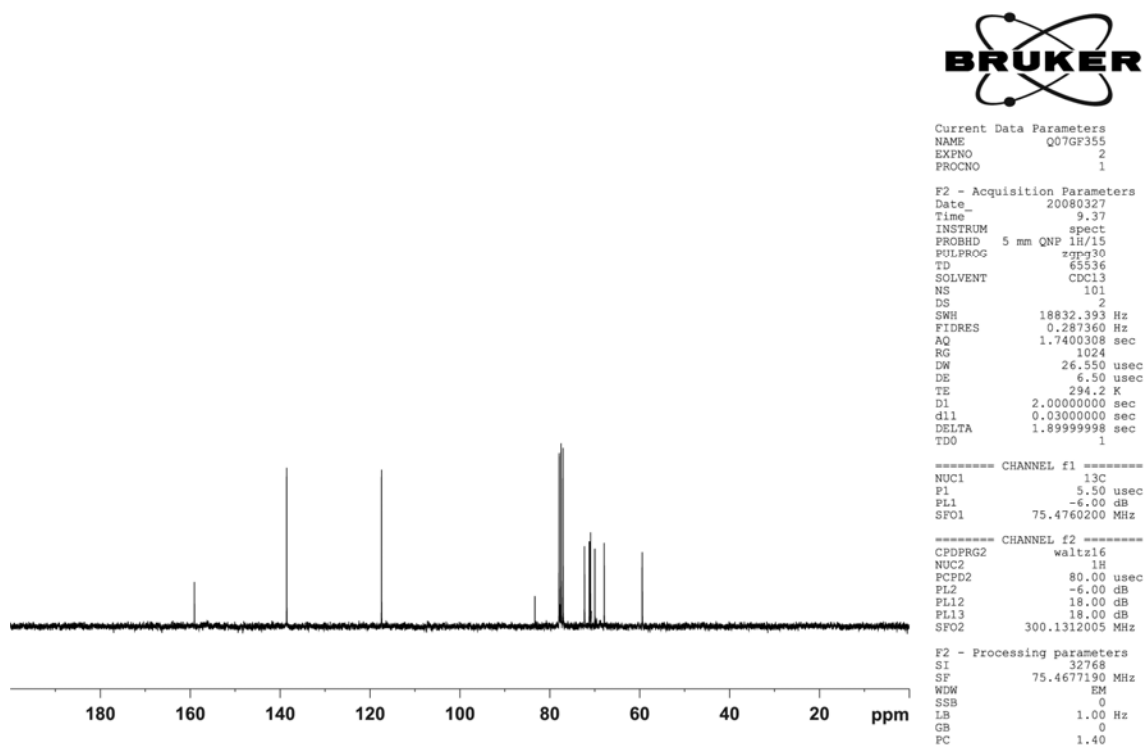

$^{13}\text{C}$  NMR ( $\text{CDCl}_3$ , 75 MHz, 298 K) of compound 5

## Compound 1

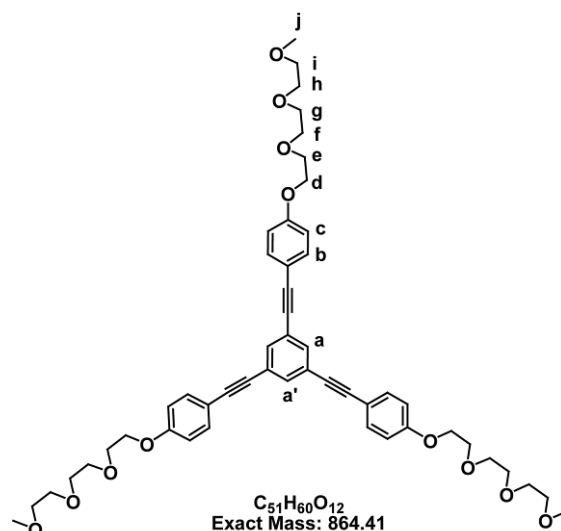

Compound **5** (2.68 g, 7.33 mmol), bis-(triphenylphosphine)-palladium(II)-chloride (0.12 g, 0.17 mmol) and copper (I) iodide (0.04 g, 0.20 mmol) were dissolved in triethylamine (50 mL). The mixture was subjected to several vacuum/argon cycles and compound **3b** (0.50 g, 3.33 mmol) was added. The mixture was heated at 70 °C for 2 hours and then was allowed to warm up until room temperature and stirred overnight. After evaporation of the solvent under reduced pressure, the residue was purified by column chromatography (silica gel,  $CHCl_3/EtOH$  20:1) affording **1** as a brown oil (2.00 g, 69%);  $^1H$  NMR ( $CDCl_3$ , 300 MHz)  $\delta$  7.58 (3H,  $H_a$ , s), 7.45 (6H,  $H_b$ , d,  $J = 9$ Hz), 6.91 (6H,  $H_c$ , d,  $J = 9$ Hz), 4.15 (6H,  $H_d$ , t,  $J = 6$  Hz), 3.87 (6H,  $H_e$ , t,  $J = 6$  Hz), 3.76-3.54 (24H,  $H_{f+g+h+i}$ , m); 3.39 (9H,  $H_j$ , s);  $^{13}C$  NMR ( $CDCl_3$ , 75Mz)  $\delta$  159.5, 133.8, 133.5, 124.6, 115.5, 115.1, 90.8, 87.2, 72.3, 71.2, 71.1, 71.0, 70.0, 67.9, 59.5;  $^1H$  NMR ( $C_6D_6$ , 300MHz)  $\delta$  7.84 (2H,  $H_a$ , s), 7.55 (6H,  $H_b$ , d,  $J = 9$  Hz), 6.79 (6H,  $H_c$ , d,  $J = 9$  Hz), 6.36 (1H,  $H_{a'}$ , s), 3.81-3.78 (6H,  $H_d$ , m), 3.62-3.59 (6H,  $H_e$ , m), 3.56-3.53 (18H,  $H_{f+g+h+i}$ , m), 3.45-3.41 (6H,  $H_j$ , m), 3.21 (9H, s);  $^{13}C$  NMR ( $C_6D_6$ , 75Mz)  $\delta$  159.8, 134.1, 133.7, 125.3, 115.8, 115.2, 91.6, 87.7, 77.9, 72.5, 71.3, 71.2, 71.1, 69.9, 67.8, 58.8; FTIR (neat) 642, 681, 734, 832, 876, 947, 1059, 1108, 1175, 1248, 1289, 1415, 1485, 1508, 1578, 1605, 2209, 2877, 3051  $cm^{-1}$ ; MALDI-TOF-MS  $m/z$  864.4. HRMS: calcd. for  $C_{51}H_{60}O_{12}$  [M], 864.40851; found, 864.40793.

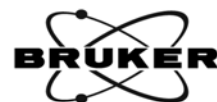

```
Current Data Parameters
NAME      Q07FG50_P
EXPNO    1
PROCNO   1

F2 - Acquisition Parameters
Date_    20080402
Time     17.13
INSTRUM  spect
PROBHDD  5 mm QNP 1H/15
PULPROG  zg30
TD       16384
SOLVENT  CDCl3
NS       16
DS       2
SWH      4496.403 Hz
FIDRES   0.274439 Hz
AQ       1.8219508 sec
RG       128
DW       111.200 usec
DE       6.50 usec
TE       294.2 K
D1       1.0000000 sec
TDO      1
```

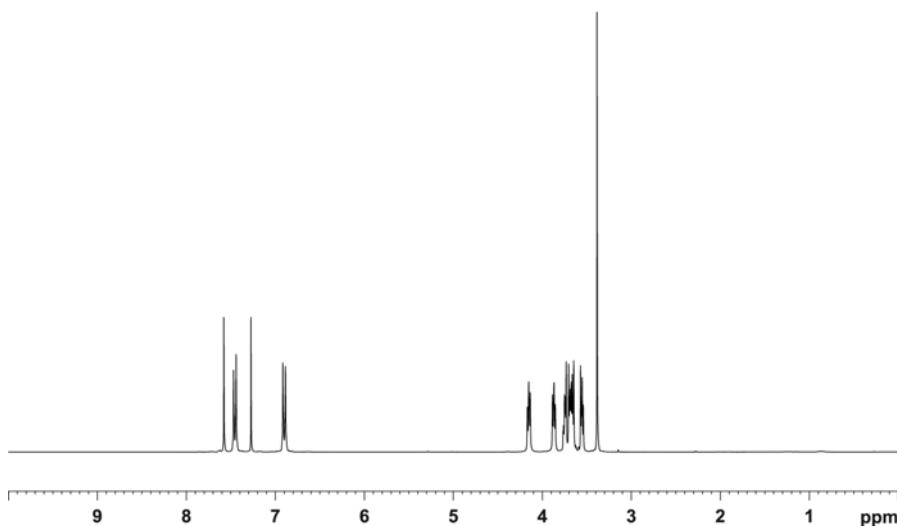

```
----- CHANNEL f1 -----
NUC1    1H
P1      7.75 usec
PL1     -6.00 dB
SFO1    300.1315007 MHz

F2 - Processing parameters
SI      32768
SF      300.1300022 MHz
WDW     EM
SSB     0
LB      0.30 Hz
GB      0
PC      1.00
```

$^1\text{H}$  NMR ( $\text{CDCl}_3$ , 300 MHz, 298 K) of compound **1**

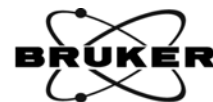

```
Current Data Parameters
NAME      Q07FG50_P
EXPNO    2
PROCNO   1

F2 - Acquisition Parameters
Date_    20080402
Time     17.15
INSTRUM  spect
PROBHDD  5 mm QNP 1H/15
PULPROG  zgpg30
TD       65536
SOLVENT  CDCl3
NS       256
DS       2
SWH      18832.393 Hz
FIDRES   0.287360 Hz
AQ       1.7400308 sec
RG       1448.2
DW       26.550 usec
DE       6.50 usec
TE       294.2 K
D1       2.0000000 sec
d11      0.0300000 sec
DELTA    1.89999998 sec
TDO      1
```

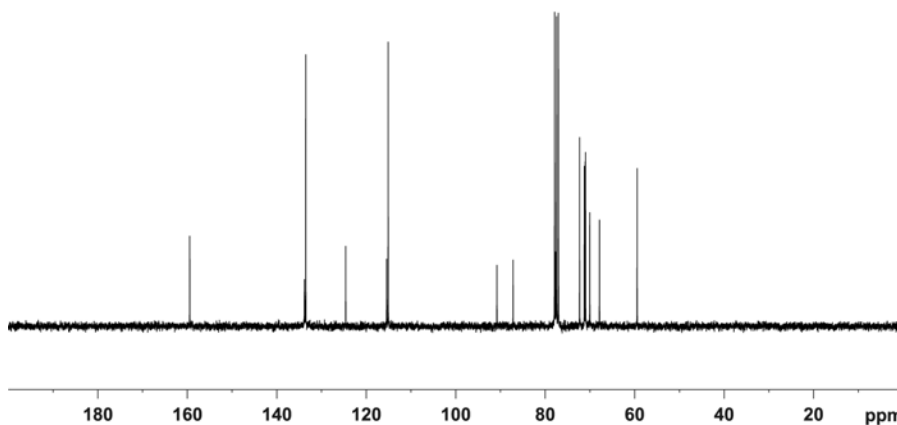

```
----- CHANNEL f1 -----
NUC1    13C
P1      5.50 usec
PL1     -6.00 dB
SFO1    75.4760200 MHz

----- CHANNEL f2 -----
CPDPRG2  waltz16
NUC2     1H
PCPD2    80.00 usec
PL2      -6.00 dB
PL12     18.00 dB
PL13     18.00 dB
SFO2    300.1312005 MHz

F2 - Processing parameters
SI      32768
SF      75.4677190 MHz
WDW     EM
SSB     0
LB      1.00 Hz
GB      0
PC      1.40
```

$^{13}\text{C}$  NMR ( $\text{CDCl}_3$ , 75 MHz, 298 K) of compound **1**



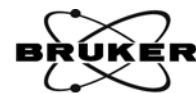

```
Current Data Parameters
NAME      Q07FG50-C6D6
EXPNO    1
PROCNO   1

F2 - Acquisition Parameters
Date_    20080412
Time     11.02
INSTRUM  spect
PROBHD   5 mm CPTCI 1H-
PULPROG  zgpg30
TD       16384
SOLVENT  C6D6
NS       1
DS       0
SWH      10504.202 Hz
FIDRES   0.641126 Hz
AQ       0.7799284 sec
RG       1
DW       47.600 usec
DE       9.00 usec
TE       298.0 K
D1       1.0000000 sec
TDO      1

===== CHANNEL f1 =====
NUC1     1H
P1       7.25 usec
PL1     4.00 dB
SFO1    700.1742010 MHz

F2 - Processing parameters
SI       32768
SF       700.1700000 MHz
WDW      EM
SSB      0
LB       0.30 Hz
GB       0
PC       1.00
```

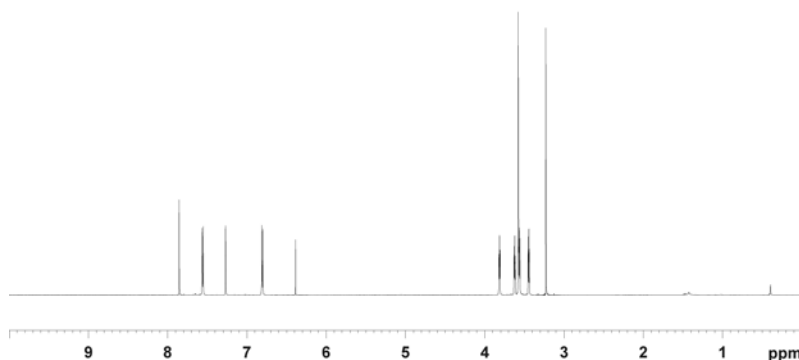

$^1\text{H}$  NMR ( $\text{C}_6\text{D}_6$ , 300 MHz, 298 K) of compound **1**

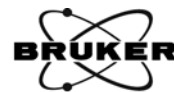

```
Current Data Parameters
NAME      Q07FG50_Benceno
EXPNO    11
PROCNO   1

F2 - Acquisition Parameters
Date_    20080407
Time     16.44
INSTRUM  spect
PROBHD   5 mm QNP 1H/13
PULPROG  zgpg30
TD       65536
SOLVENT  CDCl3
NS       64
DS       2
SWH      18832.393 Hz
FIDRES   0.287360 Hz
AQ       1.7400308 sec
RG       1024
DW       26.550 usec
DE       6.40 usec
TE       294.2 K
D1       2.0000000 sec
d11      0.0300000 sec
DELTA    1.8999998 sec
TDO      1

===== CHANNEL f1 =====
NUC1     13C
P1       5.50 usec
PL1     -6.00 dB
SFO1    75.4760200 MHz

===== CHANNEL f2 =====
CPDPRG2  waltz16
NUC2     1H
PCPD2    80.00 usec
PL2     -6.00 dB
PL12    18.00 dB
PL13    18.00 dB
SFO2    300.1312005 MHz

F2 - Processing parameters
SI       32768
SF       75.4677190 MHz
WDW      EM
SSB      0
LB       1.00 Hz
GB       0
PC       1.00
```

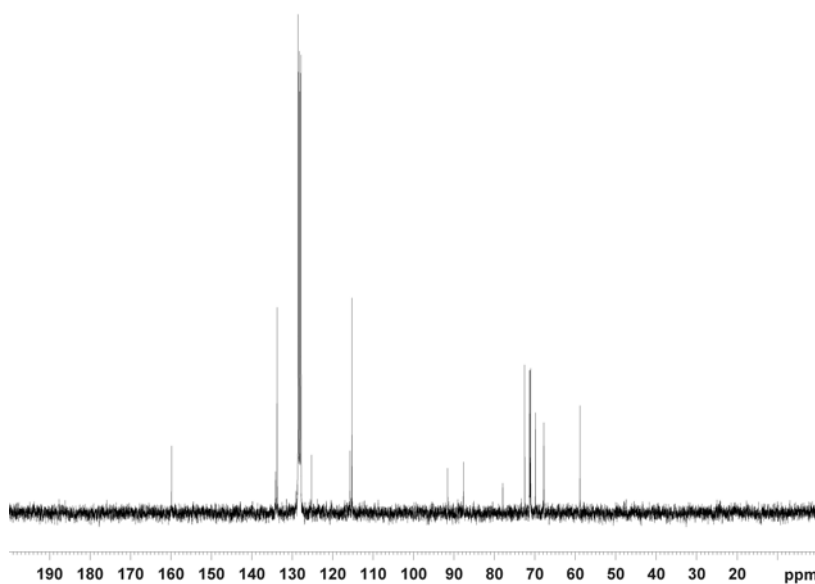

$^{13}\text{C}$  NMR ( $\text{C}_6\text{D}_6$ , 75 MHz, 298 K) of compound **1**

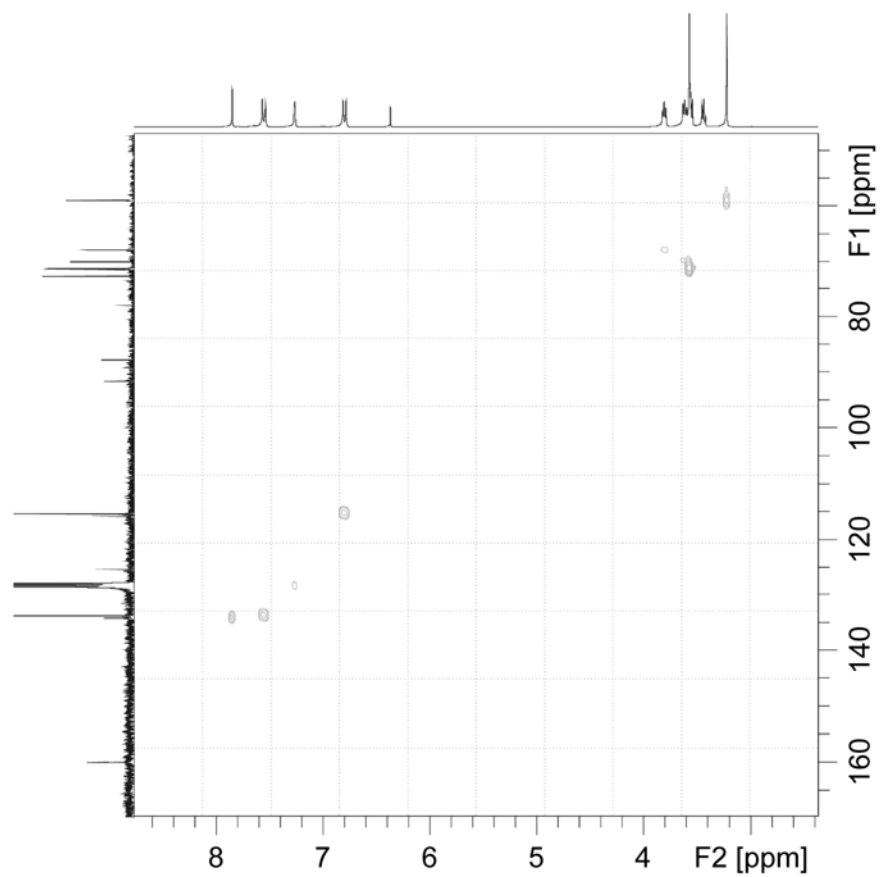

$^1\text{H}$ ,  $^{13}\text{C}$ -HMQC spectrum ( $\text{C}_6\text{D}_6$ , 298 K) of compound **1**.

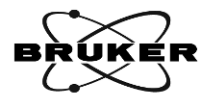

```
Current Data Parameters
NAME      Q07FG30_MeCN_OK
EXPNO     1
PROCNO    1

F2 - Acquisition Parameters
Date_     20080228
Time      16.03
INSTRUM   spect
PROBHD    5 mm QNP 1H/15
PULPROG   zg30
TD         16384
SOLVENT   CD3CN
NS         4
DS         2
SWH        5995.204 Hz
FIDRES     0.365918 Hz
AQ         1.3664756 sec
RG         30.5
DW         63.400 usec
DE         6.50 usec
TE         295.2 K
D1         1.00000000 sec
TDO        1

===== CHANNEL f1 =====
NUC1      1H
P1        7.75 usec
PL1       -6.00 dB
SFO1      300.1321309 MHz

F2 - Processing parameters
SI         32768
SF         300.1300222 MHz
WDW        EM
SSB         0
LB         0.30 Hz
GB         0
PC         1.00
```

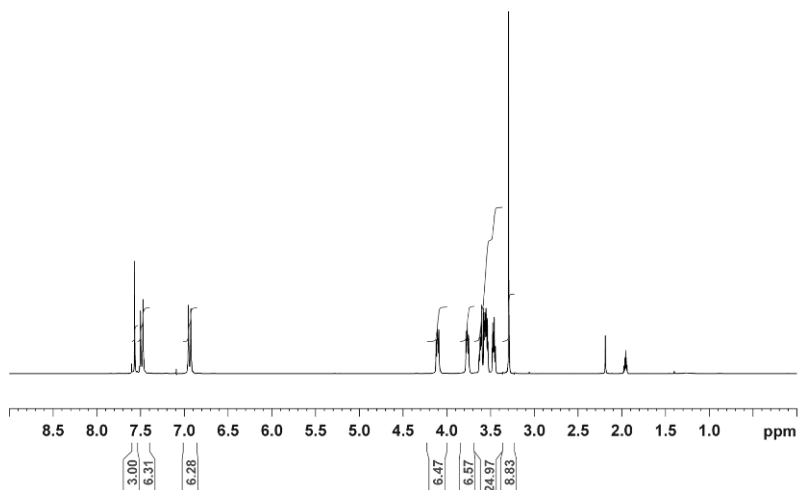

<sup>1</sup>H NMR (CD<sub>3</sub>CN, 300 MHz, 298 K) of compound 1

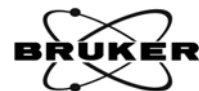

```
Current Data Parameters
NAME      Q07FG50_Benceno
EXPNO     1
PROCNO    1

F2 - Acquisition Parameters
Date_     20080404
Time      15.42
INSTRUM   spect
PROBHD    5 mm QNP 1H/15
PULPROG   zg30
TD         16384
SOLVENT   C6D6
NS         4
DS         2
SWH        4496.403 Hz
FIDRES     0.274439 Hz
AQ         1.8219508 sec
RG         114
DW         111.200 usec
DE         6.50 usec
TE         294.2 K
D1         1.00000000 sec
TDO        1

===== CHANNEL f1 =====
NUC1      1H
P1        7.75 usec
PL1       -6.00 dB
SFO1      300.1315007 MHz

F2 - Processing parameters
SI         32768
SF         300.1300222 MHz
WDW        EM
SSB         0
LB         0.30 Hz
GB         0
PC         1.00
```

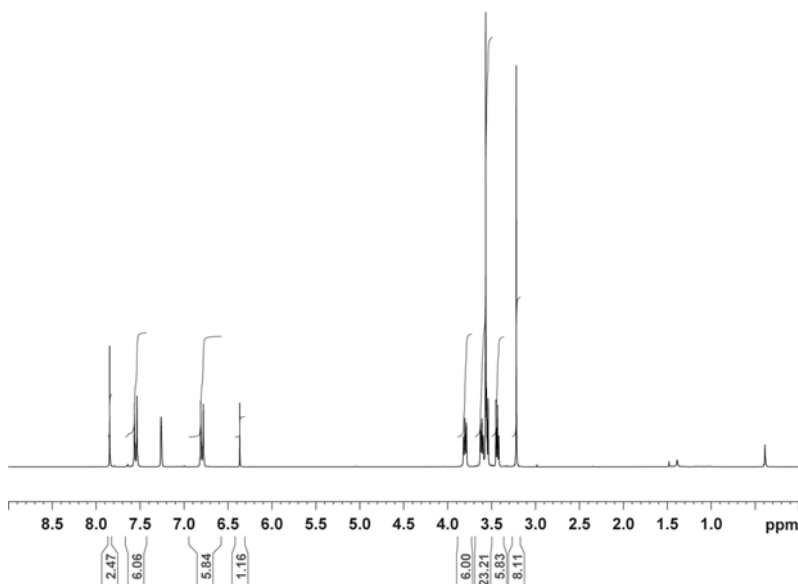

<sup>1</sup>H NMR (C<sub>6</sub>D<sub>6</sub>, 300 MHz, 298 K) of compound 1
